# Supplementary material
Source: Springer Nature journal article supplement (https://www.springermedizin.de/resource/supplementary/12906_2012_1263_MOESM9_ESM.pdf/9520080)

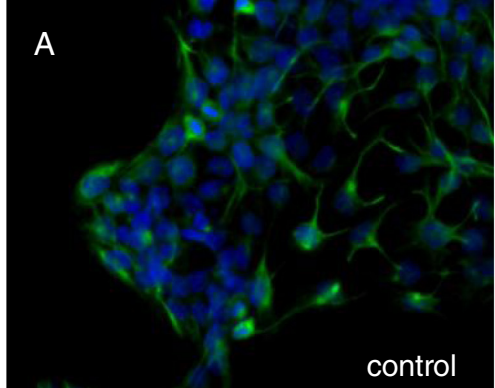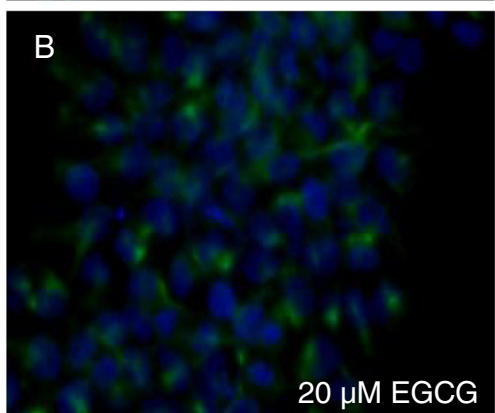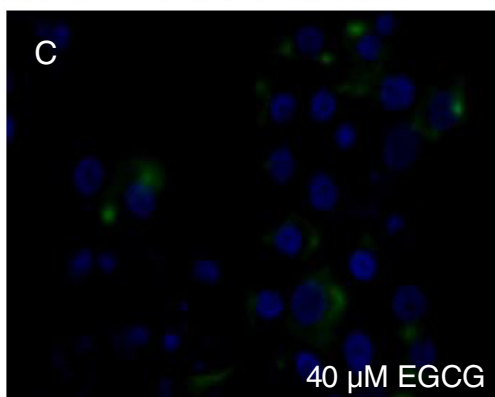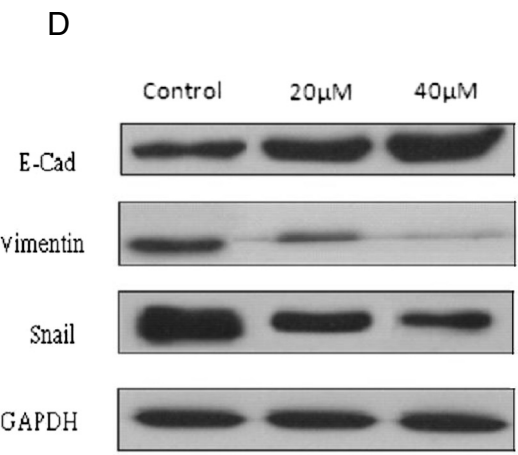

Supplement: MOESM9 [file 9520080]
